# Supplementary material for: Phenotype Specific Analyses Reveal Distinct Regulatory Mechanism for Chronically Activated p53
Source: PLoS Genet. 2015 Mar 19;11(3):e1005053. doi: 10.1371/journal.pgen.1005053 (PMC4366240; doi:10.1371/journal.pgen.1005053)
Supplement: S2 Table — (XLSX) [file pgen.1005053.s009.xlsx]

## Sheet: Sheet1
Table S2: ChIP-Seq replicate information
Factor	Condition	Replicate ID	Original	delRand	Excluded	Filtered	Unique
p53	pApo	4	26018142	23565260	23762146	19471973	13868220
p53	pApo	4	25290570	22885160	23077148	18926831	13604075
p53	pApo	6	32222479	29096054	29328756	24577729	2205464
p53	pApo	6	32086511	28941821	29173466	24437321	2193791
p53	pApo	2	33814816	30244539	30486635	24938018	23600034
p53	pApo	2	26327384	23566632	23753061	19371558	18492806
Input	pApo	2	15632393	12100163	12183833	11656004	11538839
Input	pApo	3	34268864	31292927	31557722	26362971	25480461
p53	RIS	3	35684423	31035478	31295608	25884232	22251999
p53	RIS	3	30936255	27325887	27550166	22679449	19804293
p53	RIS	3	28190325	24819342	25025909	20661871	18327768
p53	RIS	4	35986796	31125689	31391502	26409390	14767813
p53	RIS	4	27683584	24019996	24220786	20246469	12743474
p53	RIS	5	27218642	24413074	24613618	20626402	6150335
p53	RIS	5	29130803	26304378	26520791	22241086	6226758
Input	RIS	1	17870011	NA	16744171	13863727	13690337
Input	RIS	2	31239789	25939326	26105007	24904881	24462237
p53	acDDR	9	26527261	23917247	24161683	19984606	15868029
p53	acDDR	9	26668359	23450294	23688852	19590829	15602564
p53	acDDR	1	69109867	63685604	64187427	52752687	39415143
p53	acDDR	1	23338357	21209460	21378467	17646600	15921928
p53	acDDR	1	23535111	20811656	20977494	17315730	15648773
p53	acDDR	2	58702592	53885014	54311619	44748940	30851825
p53	acDDR	2	26139226	23693629	23883563	19745916	16575291
p53	acDDR	2	28283400	24312529	24508309	20302858	16988609
Input	acDDR	1	32582045	30011110	30252238	24790805	23296508
Input	acDDR	1	20947131	18017590	18174892	15247258	14992368
Input	acDDR	1	53529176	39991754	48427130	40038063	38288876
